# Supplementary material for: Effects of Decomplexation Rates on Ternary Gene Complex Transfection with α-Poly(l-Lysine) or ε-Poly(l-Lysine) as a Decomplexation Controller in An Easy-To-Transfect Cell or A Hard-To-Transfect Cell
Source: MDPI journal article supplement (doi:10.3390/pharmaceutics12060490), 2020-05-28
Supplement: s1 [file s1]

# Supplementary Materials: Effects of Decomplexation Rates on Ternary Gene Complex Transfection with $\alpha$ -Poly(L-Lysine) or $\epsilon$ -Poly(L-Lysine) as a Decomplexation Controller in An Easy-To-Transfect Cell or A Hard-To-Transfect Cell

Kyoungnam Kim, Kitae Ryu, Hana Cho, Min Suk Shim, Yong-Yeon Cho, Joo Young Lee, Hye Suk Lee and Han Chang Kang

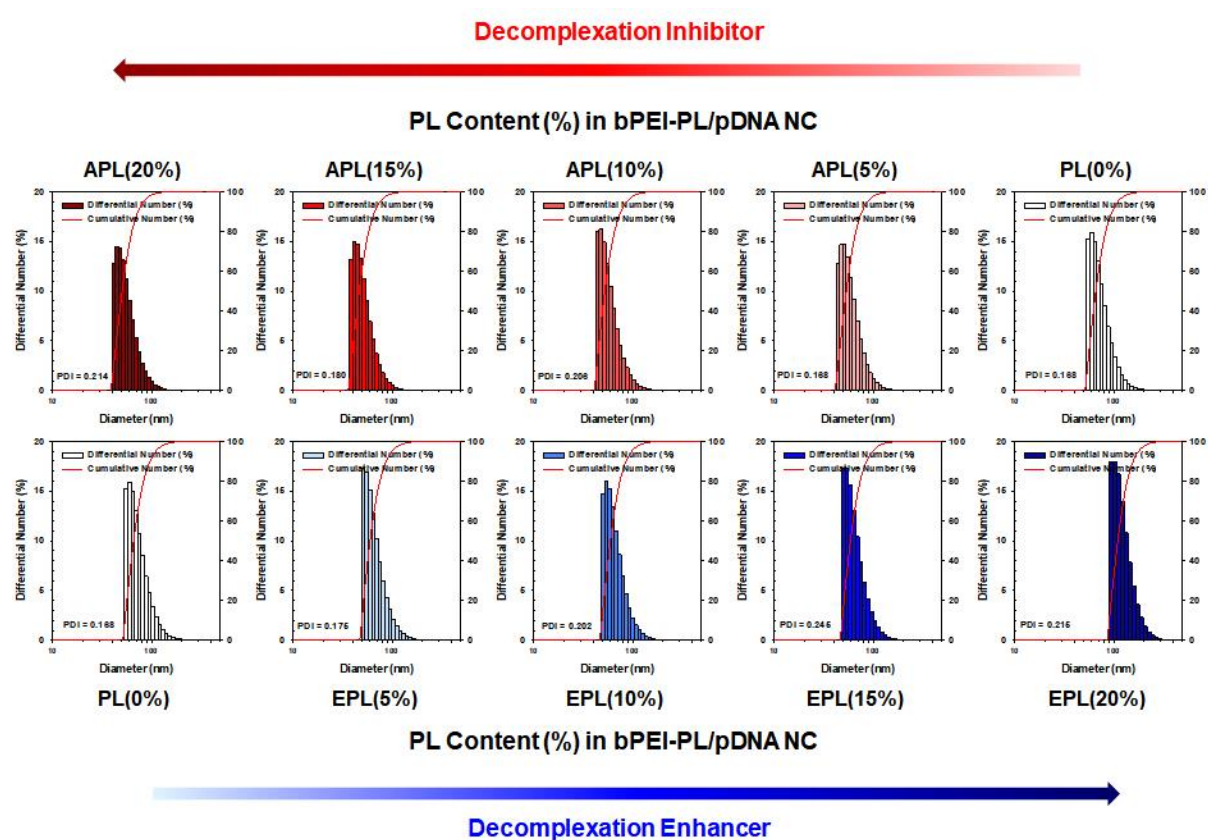

Figure S1. Size distributions of bPEI-PL/pDNA NCs.

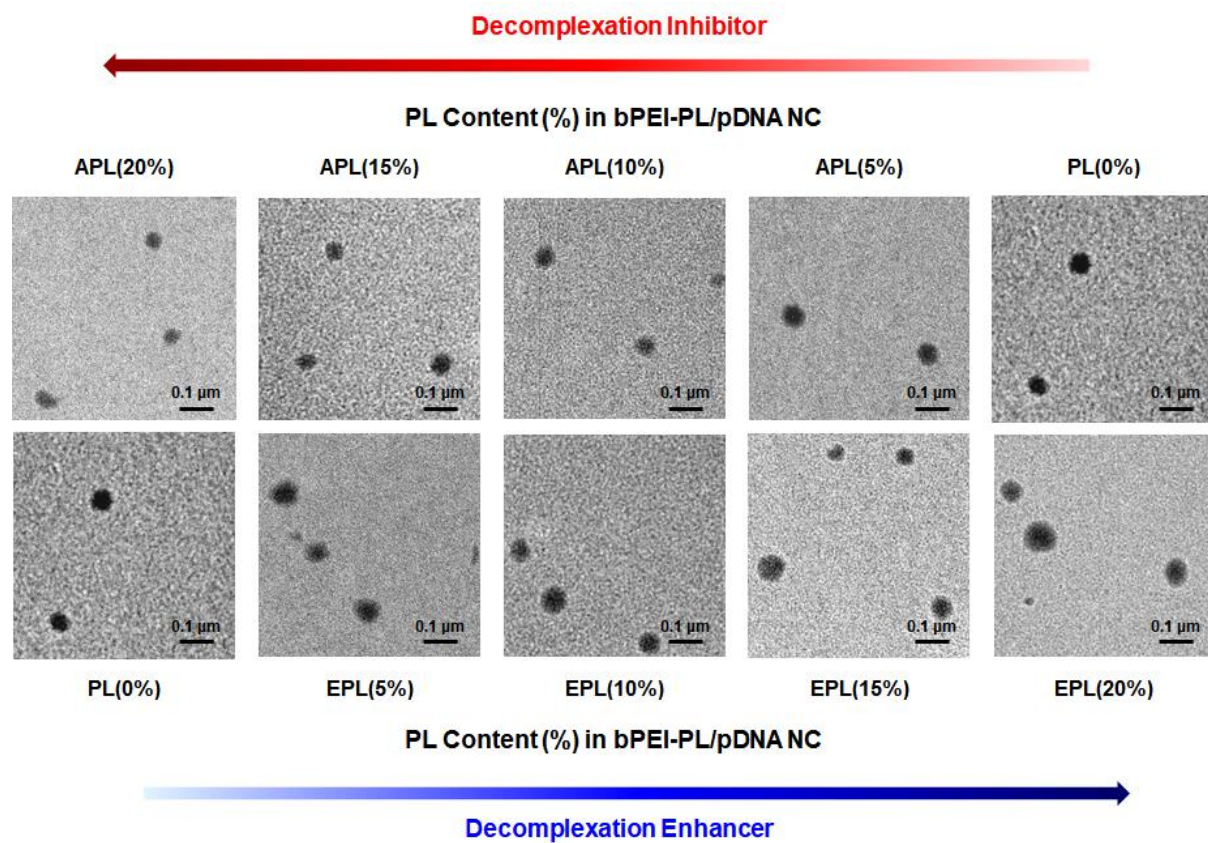

**Figure S2.** TEM images of bPEI-PL/pDNA NCs (scale bar: 0.1  $\mu\text{m}$ ).
